# Supplementary material
Source: publisher figshare collection journal article supplement (https://asha.figshare.com/articles/dataset/_/6167879)
Supplement: Supplementary file 1 [file 1]

**Supplemental Material S5.** Pearson correlations for total summarization quality scores for compare–contrast, cause–effect, and narrative lectures, age, socioeconomic (SES) factors, cognitive composite score, and expressive syntax score ( $N = 48$ ).

| <b>Discourse</b>            | <b>Summarization<br/>quality total</b> | <b>Age at<br/>testing</b> | <b>SES factor 1</b> | <b>SES factor 2</b> | <b>Cognitive<br/>composite score</b> | <b>Expressive<br/>syntax score</b> |
|-----------------------------|----------------------------------------|---------------------------|---------------------|---------------------|--------------------------------------|------------------------------------|
| <b>Compare–contrast</b>     |                                        |                           |                     |                     |                                      |                                    |
| Summarization quality total | 1.0                                    |                           |                     |                     |                                      |                                    |
| Age at testing              | .26*                                   | 1.00                      |                     |                     |                                      |                                    |
| SES factor 1                | .38**                                  | .02                       | 1.00                |                     |                                      |                                    |
| SES factor 2                | .03                                    | –.04                      | .32**               | 1.00                |                                      |                                    |
| Cognitive composite score   | .30*                                   | .30*                      | .02                 | –.03                | 1.00                                 |                                    |
| Expressive syntax score     | .10                                    | –.04                      | .35**               | .28*                | –.10                                 | 1.00                               |
| <b>Cause–effect</b>         |                                        |                           |                     |                     |                                      |                                    |
| Summarization quality total | 1.00                                   |                           |                     |                     |                                      |                                    |
| Age at testing              | .25*                                   | 1.00                      |                     |                     |                                      |                                    |
| SES factor 1                | .38**                                  | .02                       | 1.00                |                     |                                      |                                    |
| SES factor 2                | .12                                    | –.04                      | .32**               | 1.00                |                                      |                                    |
| Cognitive composite score   | .37**                                  | .30*                      | .02                 | –.03                | 1.00                                 |                                    |
| Expressive syntax score     | .26*                                   | –.04                      | .35**               | .28*                | –.10                                 | 1.00                               |
| <b>Narrative</b>            |                                        |                           |                     |                     |                                      |                                    |
| Summarization quality total | 1.00                                   |                           |                     |                     |                                      |                                    |
| Age at testing              | .24*                                   | 1.00                      |                     |                     |                                      |                                    |
| SES factor 1                | .37**                                  | .02                       | 1.00                |                     |                                      |                                    |
| SES factor 2                | .25*                                   | –.04                      | .32*                | 1.00                |                                      |                                    |
| Cognitive composite score   | –.06                                   | .30*                      | .02                 | –.03                | 1.00                                 |                                    |
| Expressive syntax score     | .47***                                 | –.04                      | .35**               | .28*                | –.10                                 | 1.00                               |

\* $p < .05$ . \*\* $p < .01$ . \*\*\* $p < .001$ .
