# Supplementary material
Source: publisher figshare collection journal article supplement (https://asha.figshare.com/articles/dataset/_/6167879)
Supplement: Supplementary file 2 [file 1]

**Supplemental Material S4.** Pearson correlations for Expressive Syntax score, MLU, and SI for compare–contrast, cause–effect, and narrative summaries ( $N = 50$ ).

|                                    | Compare–contrast<br>MLU | Compare–contrast<br>SI | Cause–effect<br>MLU | Cause–effect<br>SI | Narrative<br>MLU | Narrative<br>SI | Expressive<br>syntax score |
|------------------------------------|-------------------------|------------------------|---------------------|--------------------|------------------|-----------------|----------------------------|
| <b>Compare–contrast</b>            |                         |                        |                     |                    |                  |                 |                            |
| MLU                                | 1.0                     |                        |                     |                    |                  |                 |                            |
| SI                                 | .71**                   | 1.0                    |                     |                    |                  |                 |                            |
| <b>Cause–effect</b>                |                         | .52**                  |                     |                    |                  |                 |                            |
| MLU                                | .59**                   |                        | 1.0                 |                    |                  |                 |                            |
| SI                                 | .40**                   | .51**                  | .58**               | 1.0                |                  |                 |                            |
| <b>Narrative</b>                   |                         |                        |                     |                    |                  |                 |                            |
| MLU                                | .57**                   | .30*                   | .40**               | .36*               | 1.0              |                 |                            |
| SI                                 | .34**                   | .28                    | .25                 | .32*               | .81**            | 1.0             |                            |
| <b>Expressive syntax<br/>score</b> | .37**                   | .17                    | .29*                | .15                | .46**            | .41**           | 1.0                        |

*Note.* MLU = mean length of utterance in C-units (C-units = an independent clause and any accompanying dependent [i.e., subordinate] clauses); SI = subordination index.

\* $p < .05$ . \*\* $p < .01$ .
