# Supplementary material
Source: publisher figshare collection journal article supplement (https://asha.figshare.com/articles/dataset/_/6167879)
Supplement: Supplementary file 3 [file 1]

**Supplemental Material S2.** Descriptions of compare–contrast, cause–effect, and narrative lectures.

| <b>Discourse genre (and type, if appropriate)</b> | <b>Summary description</b>                                                                                                                                                                                                                                                                |
|---------------------------------------------------|-------------------------------------------------------------------------------------------------------------------------------------------------------------------------------------------------------------------------------------------------------------------------------------------|
| Expository (compare–contrast)                     | Main idea: There are several advantages and disadvantages to living in a Lifeland city. The lecture describes four main comparative relationships contrasting advantages and disadvantages of housing, education, employment, and population growth in Lifeland’s cities.                 |
| Expository (cause–effect)                         | Main idea: Lifeland led the world in inventions during the 600–700s. The lecture presents four main causative relationships describing how the inventions in Lifeland affected other nations in four important areas: early inventions, shipbuilding, written language, and architecture. |
| Narrative                                         | Main idea: In the midst of a Lifeland disaster, the kindness and selflessness of the “man in the water,” who died after helping others be saved before himself, reminded observers and survivors of the good of humankind.                                                                |
