# Supplementary material
Source: publisher figshare collection journal article supplement (https://asha.figshare.com/articles/dataset/_/6167879)
Supplement: Supplementary file 4 [file 1]

**Supplemental Material S3.** Tests used from the National Institutes of Health Toolbox Cognition Battery (see Bauer & Zelazo, 2013; Weintraub et al., 2013).

| Test                                          | Area assessed                                         | Test time<br>(minutes) | Mode of response | Brief description of task                                                                                                                                                                                                                                                                        |
|-----------------------------------------------|-------------------------------------------------------|------------------------|------------------|--------------------------------------------------------------------------------------------------------------------------------------------------------------------------------------------------------------------------------------------------------------------------------------------------|
| Flanker inhibitory control and attention test | Attention & executive function (inhibition, shifting) | 3                      | Keyboard         | Make rapid decisions about the directionality of a middle arrow, in an array of five, while ignoring distracting stimuli (the other arrows)                                                                                                                                                      |
| Picture sequence memory test                  | Episodic memory                                       | 7                      | Mouse            | Reproduce a sequence of 15-step and 18-step picture sequences                                                                                                                                                                                                                                    |
| List sorting working memory test              | Working memory                                        | 7                      | Verbal           | Sequence stimuli (presented as a picture with the written and auditory label) in 2 different conditions: (1) order objects (either food or animals) in size order from smallest to largest and (2) when presented with food and animals, order food items in size-order first and animals second |
| Dimensional change card sort test             | Executive function (flexibility, shifting attention)  | 4                      | Keyboard         | Match a series of test pictures to target pictures, according to either shape or color                                                                                                                                                                                                           |
| Pattern comparison processing speed test      | Processing speed                                      | 3                      | Keyboard         | Determine whether two side-by-side pictures are the same or not                                                                                                                                                                                                                                  |

## References

- Bauer, P. J., & Zelazo, P. D. (2013). IX. NIH Toolbox cognition battery (CB): Summary, conclusions, and implications for cognitive development. *Monographs of the Society for Research in Child Development*, 78(4), 133–146. <https://doi.org/10.1111/mono.12039>
- Weintraub, S., Dikmen, S. S., Heaton, R. K., Tulsky, D. S., Zelazo, P. D., Bauer, P. J., . . . Gershon, R. C. (2013). Cognition assessment using the NIH Toolbox. *Neurology*, 80(11, Suppl. 3), S54–S64. <https://doi.org/10.1212/WNL.0b013e3182872ded>
