# Supplementary material
Source: publisher figshare collection journal article supplement (https://asha.figshare.com/articles/dataset/_/6167879)
Supplement: Supplementary file 5 [file 1]

**Supplemental Material S1.** Descriptive block-level U.S. Census values for participants and rotated structure matrix for principal component analysis with Varimax rotation of socioeconomic status (SES) variables.

| U.S. Census variable | Block-level Census values<br><i>M (SD)</i> unless otherwise<br>indicated | Rotated component coefficients |        |
|----------------------|--------------------------------------------------------------------------|--------------------------------|--------|
|                      |                                                                          | 1                              | 2      |
| Latino               | 3.3%                                                                     | −0.916                         | 0.099  |
| Black                | 9.9%                                                                     | −0.902                         | 0.142  |
| White                | 83.79%                                                                   | 0.921                          | −0.121 |
| No school completed  | 0.4%                                                                     | 0.151                          | 0.884  |
| Per capita income    | \$30,194 (\$11,353)                                                      | 0.637                          | −0.449 |
| Unemployment         | 4.3%                                                                     | −0.238                         | 0.773  |
| Median housing value | \$198,634 (\$67,506)                                                     | 0.560                          | −0.515 |
| Median age (years)   | 45.6 (4.6)                                                               | 0.417                          | 0.029  |
